# Supplementary material for: Neurexin-3 subsynaptic densities are spatially distinct from Neurexin-1 and essential for excitatory synapse nanoscale organization in the hippocampus
Source: PubMed Central journal article supplement (PMC10404257; doi:10.1038/s41467-023-40419-2), 2023-08-05
Supplement: 41467_2023_40419_MOESM1_ESM.pdf [file 41467_2023_40419_MOESM1_ESM.pdf]

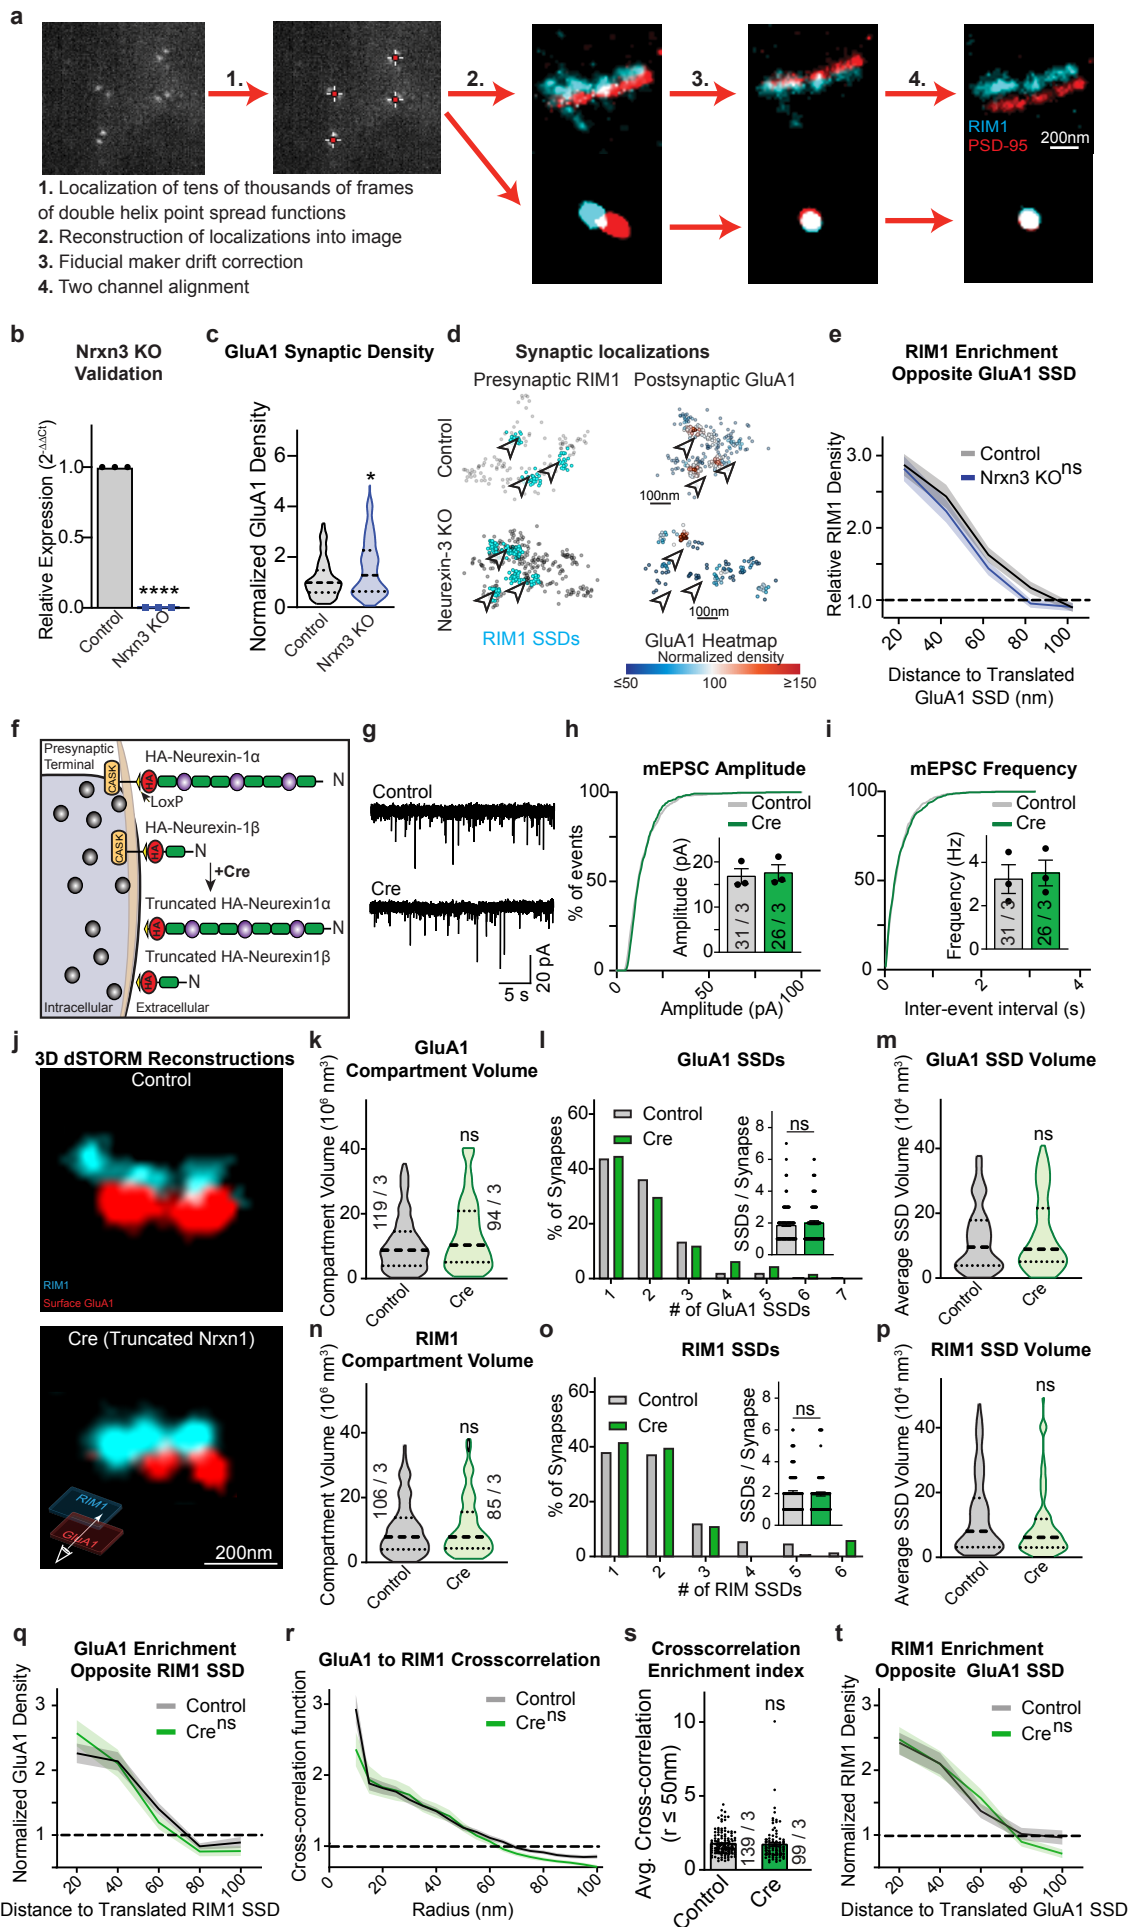

**Figure S1. *Nrxn1* truncation does not alter GluA1 and RIM1 nanoscale properties or excitatory synaptic transmission in hippocampal culture.**

(a) Schematic showing the acquisition of raw data and 3DTRAX analysis workflow as indicated with numbers 1-4. Raw double helix PSFs for localization (left). Reconstructed images (right) with corrections as indicated in figure (top) excitatory synapse (bottom) Tetraspeck bead.

(b) Lentivirus transduction of cre-recombinase into *Nrxn3* cKO neurons resulted in nearly undetectable levels of *Nrxn3* transcript in dissociated cortical culture,  $p < 0.0001$ ; Unpaired t-test (two-tailed)  $n = 3$  independent cultures.

(c) *Nrxn3* cKO increases the synaptic density of GluA1,  $p = 0.0129$ ,  $n = 115$  control and  $n = 139$  *Nrxn3* cKO synapses. Significance: Mann Whitney test (two-tailed).

(d) Distribution of synaptic RIM (left) and GluA1 (right) for control (top) and *Nrxn3* KO (bottom) neurons. Red and blue clusters indicate RIM1 and GluA1 SSDs, respectively. Arrows indicate enrichment of GluA1 (heatmap) opposite RIM1 SSDs (arrows).

(e) *Nrxn3* KO does not affect the transsynaptic enrichment of RIM1 opposite GluA1 SSDs,  $p = 0.1914$ ;  $n = 91$  for control and  $n = 85$  *Nrxn3* KO SSDs. Significance: 2-way repeated measures ANOVA main effect of *Nrxn3* KO.

(f) Schematic of 2xHA-*Nrxn1* showing location of 2xHA and LoxP site that results in cre-dependent truncation of *Nrxn1*.

(g-i) Representative mEPSC traces from inactive (control) and active Cre recombinase infected HA-*Nrxn1* neurons (g) show no changes in mEPSC amplitude (h;  $p = 0.7742$ ) or mEPSC frequency (i;  $p = 0.7658$ ). Note that cre-mediated truncation of *Nrxn1* results in an inactive protein product. Significance: unpaired t-test (two-tailed).  $n = 31$  control and 26 Cre neurons from 3 independent experiments.

(j) Representative 3D-dSTORM images of RIM1 (cyan) and GluA1 (red) in control (top) and Cre (truncated *Nrxn1*) neurons (bottom).

(k-m) Truncation of *Nrxn1* did not result in any changes to GluA1 compartment volume (k;  $p = 0.0946$ ), GluA1 SSDs (l;  $p = 0.6425$ ;  $n = 132$  control and  $n = 107$  cre synapses), or GluA1 SSD volume (m;  $p = 0.4706$ ;  $n = 111$  control and 95 cre synapses). Significance: Mann Whitney test (two-tailed).

(n-p) Truncation of *Nrxn1* also did not change RIM1 compartment volume (n,  $p = 0.7650$ ), RIM1 SSDs (o;  $p = 0.3934$ ;  $n = 123$  control and  $n = 98$  cre synapses), or RIM1 SSD volume (p;  $p = 0.0754$ ;  $n = 117$  control and  $n = 94$  cre synapses). Significance: Mann Whitney test (two-tailed).

(q-t) *Nrxn1* truncation did not alter GluA1 / RIM1 transsynaptic alignment including GluA1 enrichment opposite RIM1 SSDs (q;  $p = 0.7806$ ;  $n = 79$  control and  $n = 39$  cre SSDs), GluA1 to RIM1 cross-correlation (r;  $p = 0.3536$ ;  $n = 139$  control and 99 cre synapses), average cross-correlation  $\leq 50$ nm (s;  $p = 0.0590$ ), or RIM1 enrichment opposite GluA1 SSDs (t;  $p = 0.8294$ ;  $n = 82$  control and  $n = 52$  cre SSDs). Significance: 2-way repeated measures ANOVA main effect of Cre and Mann Whitney test (two-tailed) as appropriate.

Data from three independent experiments. Number of synapses indicated on graph unless stated in legend. Bar graphs and line graphs: average  $\pm$  SEM. Violin plots: median  $\pm$  upper and lower quartiles.



*Nrxn3* knockout in hippocampus does not alter PSD-95/RIM1 alignment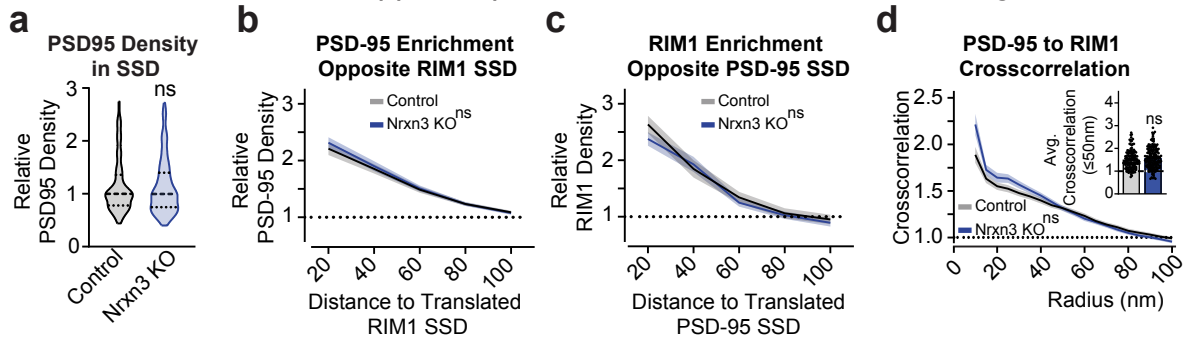*Nrxn1* truncation in hippocampus does not alter PSD-95 nano-organization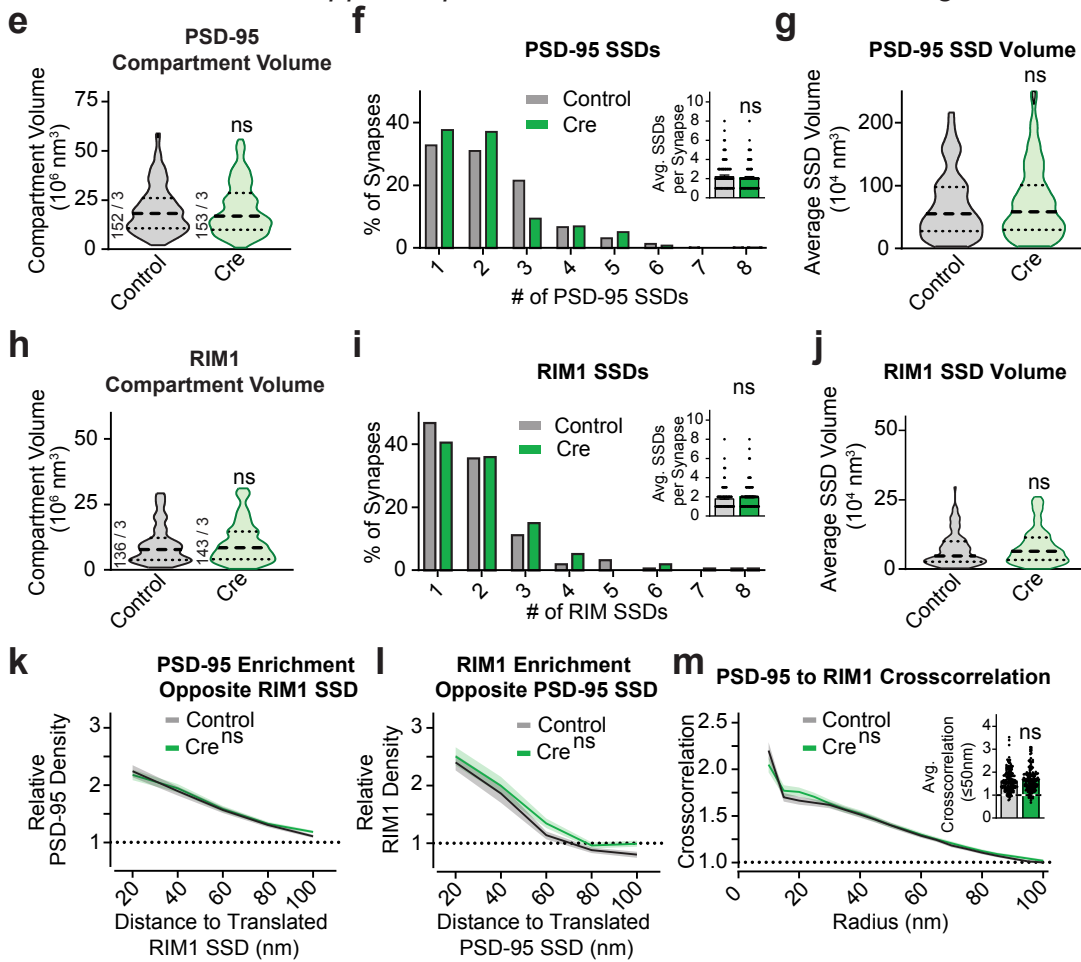*Nrxn3* knockout in cortical cultures does not alter nanocolumn alignment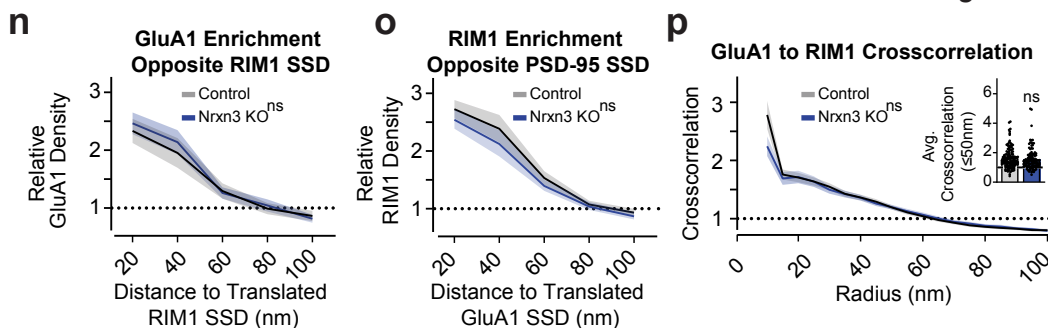

**Figure S2. Truncation of *Nrxn1* does not alter PSD-95 nanoscopic properties in hippocampal culture.**

(a) *Nrxn3* KO does not alter the density of PSD-95 localization in SSDs. Control: n=123 SSDs; *Nrxn3* KO: n=138 SSDs from 3 independent experiments. Significance: two-tailed Mann-Whitney. p=0.7444.

(b-d) *Nrxn3* KO does not alter PSD-95 / RIM1 transsynaptic alignment including PSD-95 enrichment opposite RIM1 SSDs (b; p=0.6039 n=168 control and n=178 *Nrxn3* KO SSDs), RIM1 enrichment opposite PSD-95 SSDs (c; p=0.3815 n=86 control and n=119 *Nrxn3* KO SSDs), PSD-95 to RIM1 cross-correlation (d; p=0.3575 n=142 control and n=164 *Nrxn3* KO synapses), or average cross-correlation  $\leq 50\text{nm}$  d inset; p=0.1516 n=142 control and n=162 *Nrxn3* KO synapses). Significance: 2-way repeated measures ANOVA main effect of *Nrxn3* KO and Mann Whitney test (two-tailed) as appropriate.

(e-g) *Nrxn1* truncation does not alter PSD-95 compartment volume (e; p=0.9302), PSD-95 SSDs (f; p=0.1530; n=169 control and n=163 cre synapses), or PSD-95 SSD volume (g; p=0.5952; n=155 control and n=147 cre synapses). Significance: Mann Whitney test (two-tailed).

(h-j) Truncation of *Nrxn1* does not result in changes to RIM1 compartment volume (h; p=0.6153), RIM1 SSDs (i; p=0.1928; n=152 control and n=153 cre synapses), or RIM1 SSD volume (j; p=0.1227; n=119 control and n=121 cre synapses). Significance: Mann Whitney test.

(k-m) *Nrxn1* truncation does not alter measurements of PSD-95–RIM1 transsynaptic alignment including PSD-95 enrichment opposite RIM1 SSDs (k; p=0.7508; n=167 control and n=198 cre SSDs), RIM1 enrichment opposite PSD-95 SSDs (l; p=0.0914; n=100 control n=94 cre SSDs), PSD-95 to RIM1 cross-correlation (m; p=0.5361; n=171 control and n=164 cre synapses) or average cross-correlation  $\leq 50\text{nm}$  (m inset; average cross-correlation  $\leq 50\text{nm}$ , p=0.6400; n=171 control and n=164 cre synapses). Significance: 2-way repeated measures ANOVA main effect of Cre and Mann Whitney test (two-tailed) as appropriate.

(n-p) *Nrxn3* KO in cortical neurons does not change nanocolumn alignment including GluA1 enrichment opposite RIM1 SSDs (n, p=0.6386; n=53 control and n=52 *Nrxn3* KO SSDs), RIM1 enrichment opposite PSD-95 SSDs (o, p=0.1929; n=60 control and n=61 *Nrxn3* KO SSDs), GluA1 to RIM1 cross-correlation (p, p=0.6125; n=130 control and n=116 *Nrxn3* KO synapses), or average cross-correlation  $\leq 50\text{nm}$  (p inset, p=0.2693; n=130 control and n=116 *Nrxn3* KO synapses). Significance: 2-way repeated measures ANOVA main effect of *Nrxn3* KO and Mann Whitney test (two-tailed) as appropriate.

Data from three independent experiments. Number of synapses indicated on graph unless stated in legend. Bar graphs and line graphs: average  $\pm$  SEM. Violin plots: median  $\pm$  upper and lower quartiles.

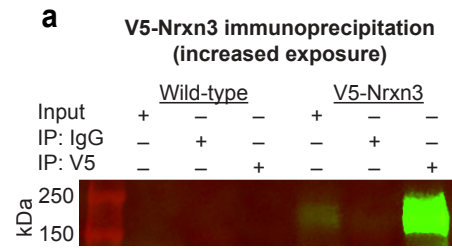

*V5-Nrxn3 does not affect pan-Nrxn nanoscale organization at Homer1+ synapses*

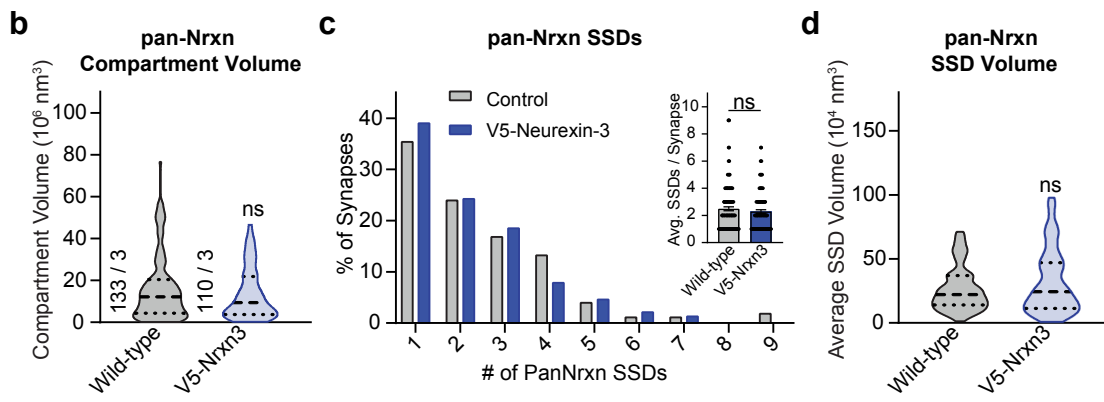

**Figure S3. The nanoscale properties of pan-Nrxns are unaltered in V5-Nrxn3 KI cultures.**

(a) Over-exposed image of V5-Nrxn3 immunoblot to show the presence of V5 immunoreactivity in V5-Nrxn3<sup>KI/KI</sup> sample but not wildtype.

(b-d) Endogenous expression of V5-Nrxn3 does not alter the nanoscale properties of pan-Nrxns including pan-Nrxn compartment volume (b;  $p=0.3714$ ), number of SSDs (c;  $p=0.4028$ ;  $n=140$  wild-type and  $n=122$  V5-Nrxn3 synapses), or SSD volume (d;  $p=0.5030$ ;  $n=125$  wild-type and  $n=109$  V5-Nrxn3 synapses). Significance: Mann Whitney test (two-tailed). Data from three independent experiments.

Number of synapses indicated on graph unless stated in legend. Bar graphs and line graphs: average  $\pm$  SEM. Violin plots: median  $\pm$  upper and lower quartiles.

*V5-Nrxn3* does not affect the number or alignment of PSD-95 or RIM1 SSDs

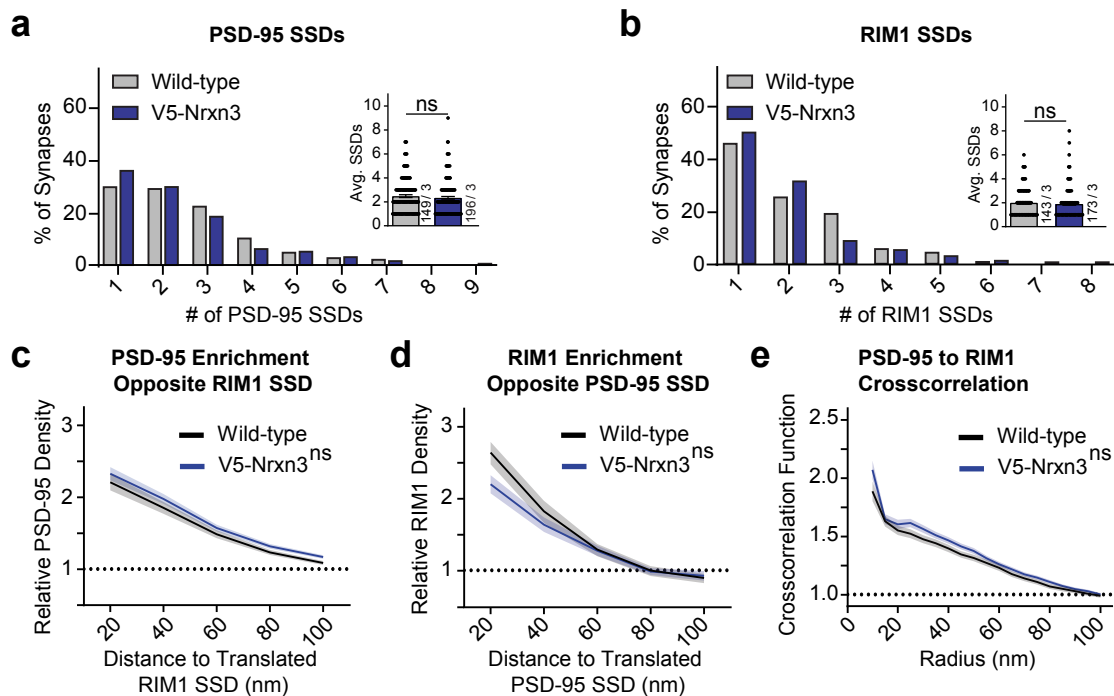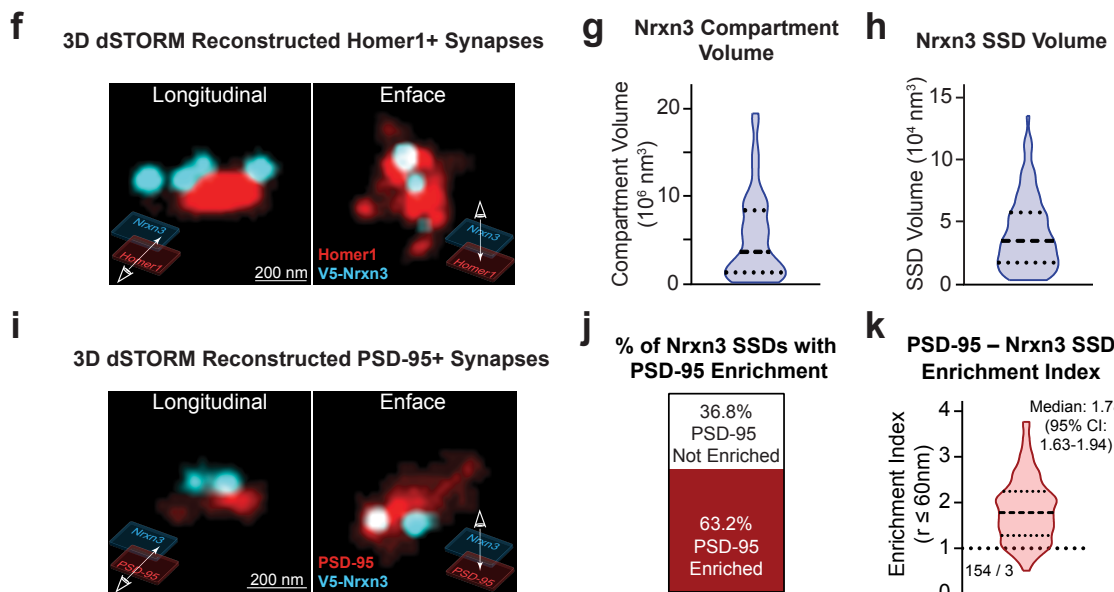

**Figure S4. V5-Nrxn3 does not alter excitatory transsynaptic alignment of PSD-95 and RIM1 and is enriched in synaptic nanocolumns.**

(a-b) Endogenous V5-Nrxn3 expression does not alter the average number of PSD-95 SSDs (a;  $p=0.1877$ ) or RIM1 SSDs (b;  $p=0.2209$ ;  $n=143$  wild-type and  $n=173$  V5-Nrxn3 synapses).

Significance: Mann Whitney test (two-tailed).

(c-e) V5-Nrxn3 does not change transsynaptic alignment of PSD-95 and RIM1 including PSD-95 enrichment opposite RIM1 SSDs (c;  $p=0.0843$ ;  $n=168$  wild-type and  $n=201$  V5-Nrxn3 SSDs), RIM1 enrichment opposite PSD-95 SSDs (d;  $p=0.1056$ ;  $n=85$  wild-type and  $n=118$  V5-Nrxn3 SSDs), and PSD-95 to RIM1 cross-correlation (e;  $p=0.1110$ ;  $n=142$  wild-type and  $n=195$  V5-Nrxn3 synapses). Significance: 2-way repeated measures ANOVA main effect of mouse line.

(f) Representative 3D-dSTORM reconstructions of V5-Nrxn3 (cyan) and Homer1 (red) in the longitudinal (left) and enface (right) orientations.

(g) Violin plot of V5-Nrxn3 compartment volume at Homer1+ synapses.  $n=93$  synapses.

(h) Violin plot of average V5-Nrxn3 SSD volume at Homer1+ synapses.  $n=98$  synapses.

(i) Representative 3D-STORM reconstructions of V5-Nrxn3 (cyan) and PSD-95 (red) in the longitudinal (left) and en face (right) orientations.

(j) Stacked bar graph showing that 63.2% of Nrxn3 SSDs had PSD-95 enrichment index of  $>1.25$ .  $n=266$  SSDs.

(k) PSD-95 enrichment at distances of 20-60nm from the translated Nrxn3 SSD.

Data from three independent experiments. Number of synapses indicated on graph unless stated in legend. Bar graphs and line graphs: average  $\pm$  SEM. Violin plots: median  $\pm$  upper and lower quartiles.

## HA-Nrxn1 does not affect the number or alignment of PSD-95 or RIM1 SSDs

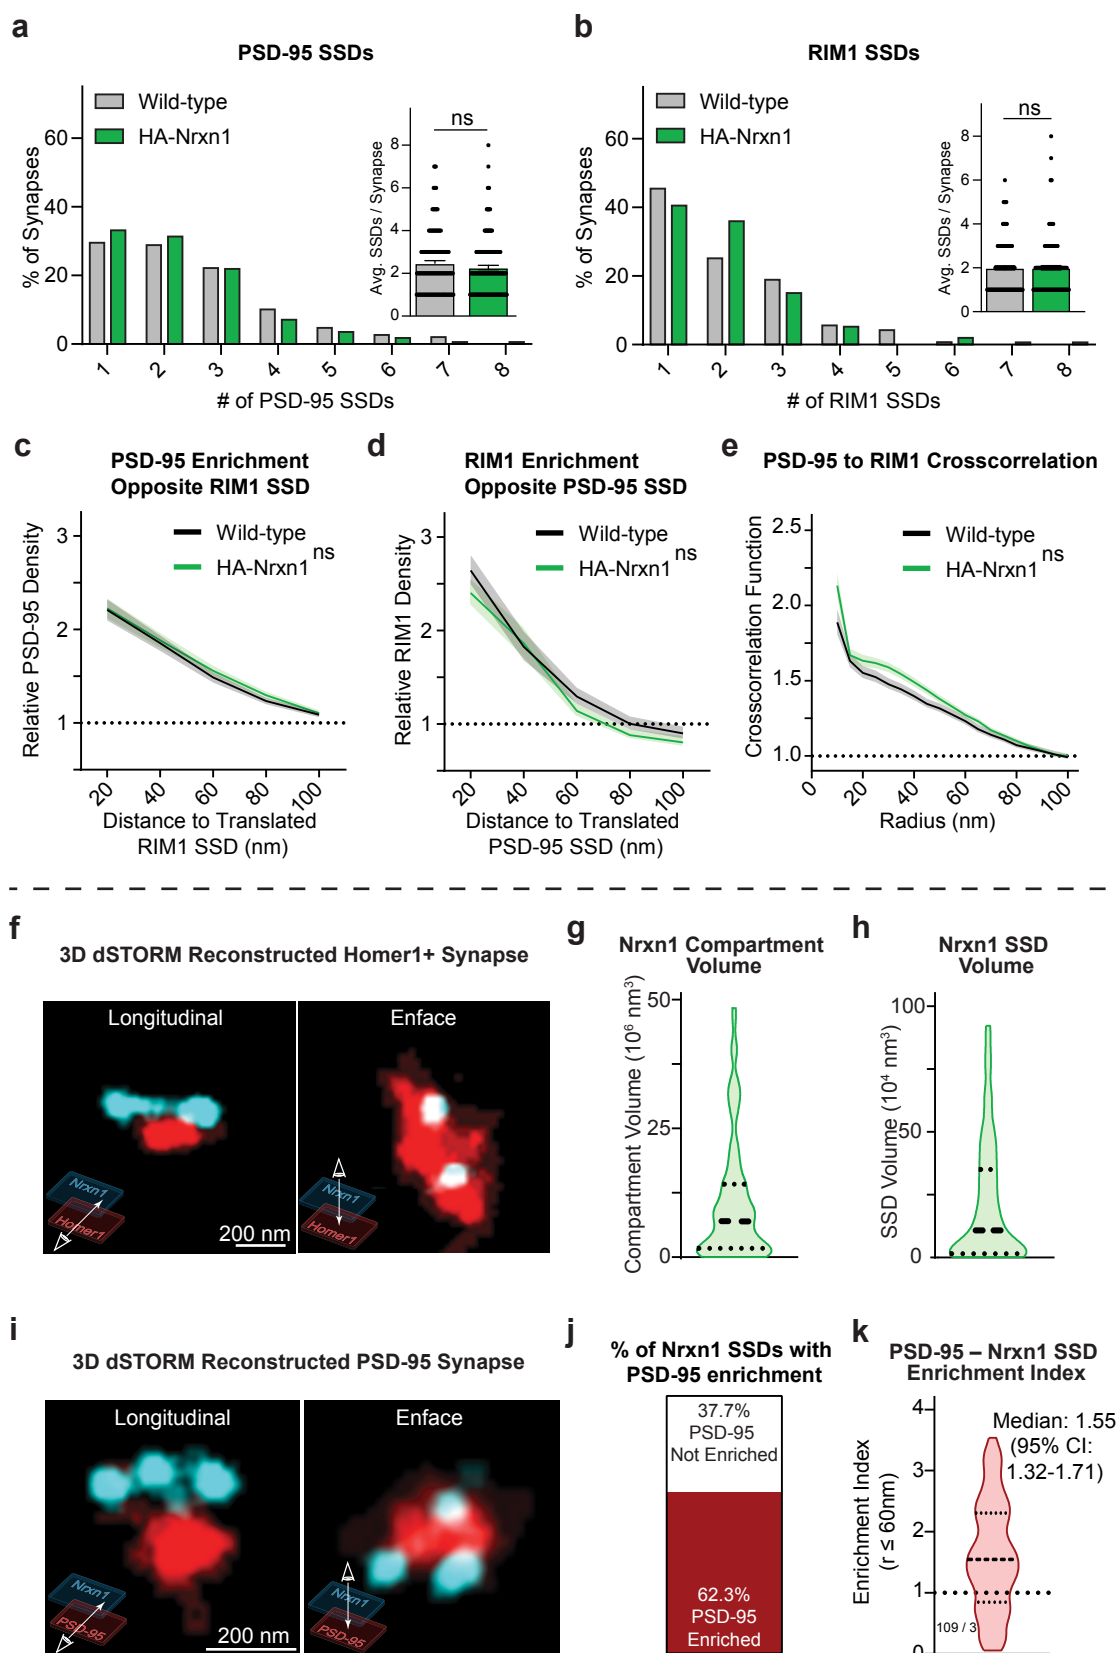



**Figure S5. HA-Nrxn1 does not alter excitatory synaptic nanocolumns.**

(a-b) Endogenous expression of HA-Nrxn1 does not alter the number of PSD-95 SSDs (a;  $p=0.2201$ ) or RIM1 SSDs (b;  $p=0.9505$ ;  $n=143$  wild-type and  $n=153$  V5-Nrxn3 synapses). Significance: Mann Whitney test (two-tailed).

(c-e) HA-Nrxn1 does not alter the transsynaptic alignment of PSD-95 enrichment opposite RIM1 SSDs (c;  $p=0.5280$ ;  $n=168$  wild-type and  $n=166$  HA-Nrxn1 SSDs), RIM1 enrichment opposite PSD-95 SSDs (d;  $p=0.1594$ ;  $n=85$  wild-type and  $n=100$  HA-Nrxn1 SSDs), or PSD-95 to RIM1 cross-correlation (e;  $p=0.0648$ ;  $n=142$  control and  $n=168$  HA-Nrxn1 synapses). Significance: 2-way repeated measures ANOVA main effect of mouse line.

(f) Representative 3D-dSTORM reconstructions of HA-Nrxn1 (cyan) and Homer1 (red) in the longitudinal (left) and enface (right) orientations.

(g-h) Violin plots of HA-Nrxn1 compartment volume (g;  $n=147$  synapses) and HA-Nrxn1 SSD volume (h;  $n=148$  synapses) at Homer1+ synapses.

(i) Representative 3D-dSTORM reconstructions of HA-Nrxn1 (cyan) and PSD-95 (red) in the longitudinal (left) and enface (right) orientations.

(j) Stacked bar graph showing that 62.3% of Nrxn1 SSDs had PSD-95 enrichment index of  $>1.25$ .  $n=151$  SSDs.

(k) PSD-95 enrichment index (20-60nm) from the translated Nrxn1 SSD.

Data from three independent experiments. Number of synapses indicated on graph unless stated in legend. Bar graphs and line graphs: average  $\pm$  SEM. Violin plots: median  $\pm$  upper and lower quartiles.

*LRRTM2 Antibody Validation*

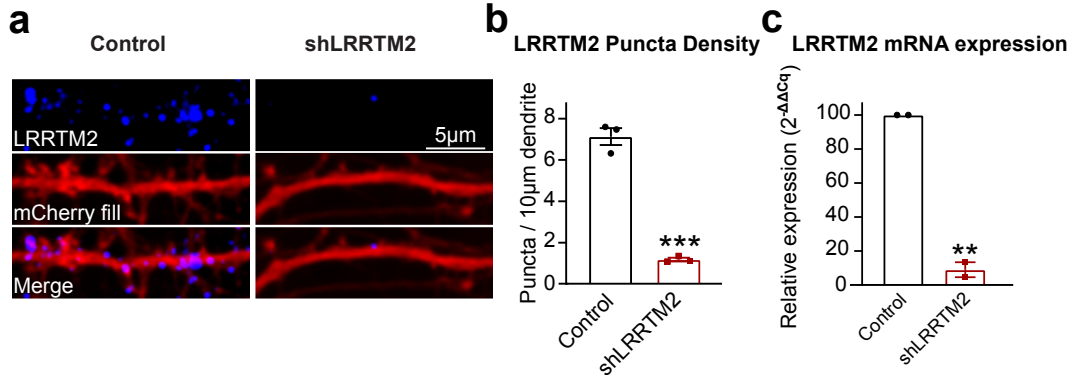

*Direct comparison of LRRTM2 properties in HA-Nrxn1 and V5-Nrxn3 neurons*

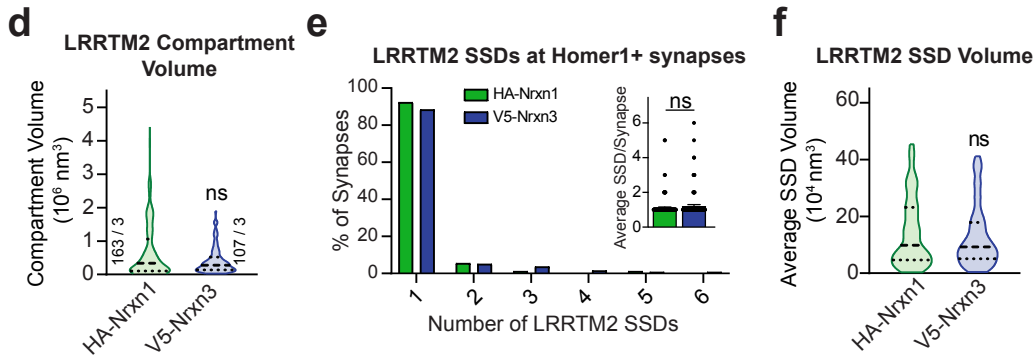

*Comparison of knockout validated GluD1 and available conjugated antibody*

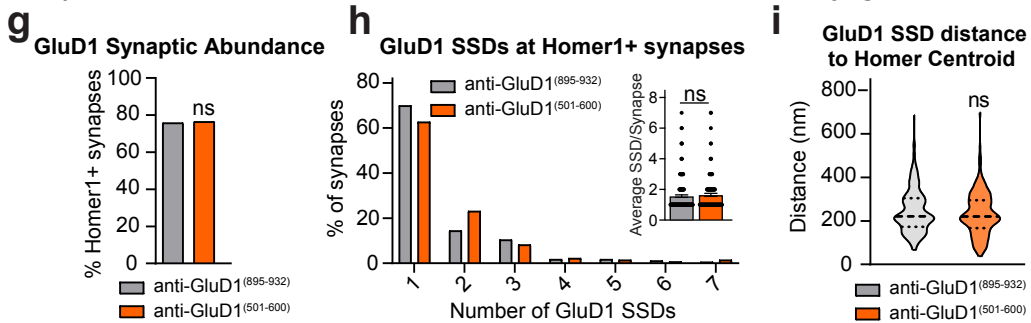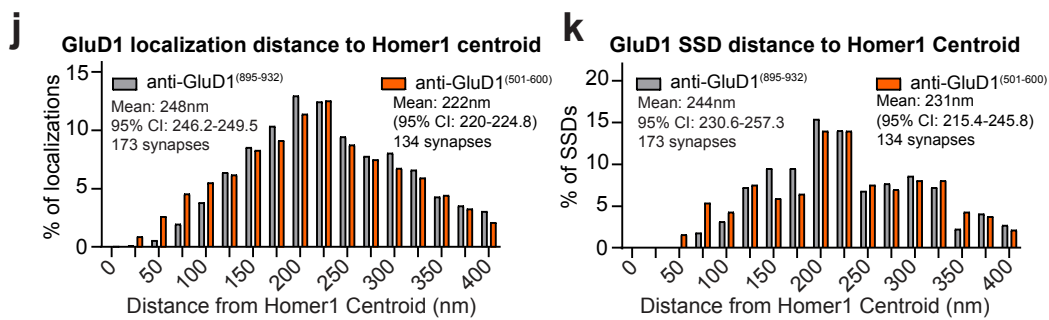

*Direct comparison of GluD1 properties in HA-Nrxn1 and V5-Nrxn3 neurons*

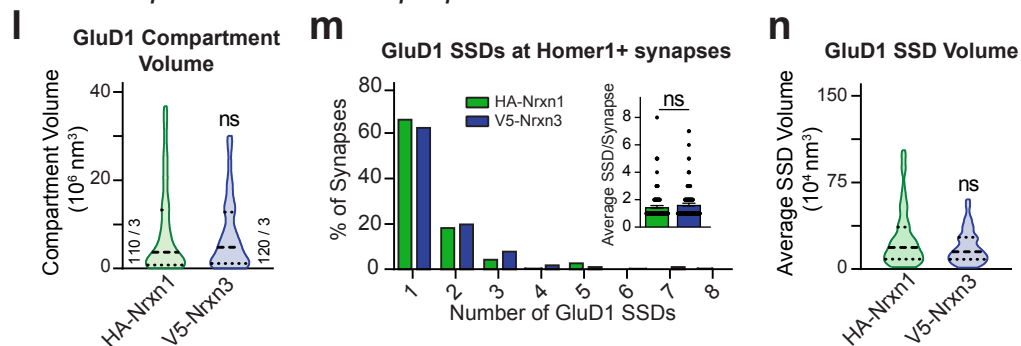

**Figure S6. Validation of surface LRRTM2 and cytoplasmic GluD1 antibodies.**

(a) Representative images of Control (mock infected) and shLRRTM2 neurons stained with an AF647 conjugated anti-LRRTM2 antibody.

(b) shRNA knockdown of LRRTM2 reduced puncta density  $p=0.0001$ . Unpaired t-test (two-tailed)  $n=3$  independent cultures.

(c) Quantitative mRNA measurements following shRNA knockdown of endogenous LRRTM2 shows reduced relative expression of *LRRTM2*  $p=0.0023$ . Unpaired t-test (two-tailed)  $n=3$  independent cultures.

(d-f) Comparison of LRRTM2 nanoscale properties in HA-Nrxn1 and V5-Nrxn3 neurons show no differences in LRRTM2 compartment volume (d;  $p=0.3033$ ), number of SSDs (e;  $p=0.2108$ ;  $n=182$  HA-Nrxn1 and  $n=138$  V5-Nrxn3 synapses), or average SSD volume (f;  $p=0.6241$ ;  $n=148$  HA-Nrxn1 and  $n=101$  V5-Nrxn3 synapses). Significance: Mann Whitney test (two-tailed).

(g-h) GluD1 antibodies targeting amino acids 895-932 (anti-GluD1<sup>895-932</sup>) and 501-600 (anti-GluD1<sup>501-600</sup>) show no differences in the proportion of Homer1+ synapses containing GluD1 (g;  $p=0.8773$ ;  $n=232$  anti-GluD1<sup>895-932</sup> synapses and  $n=196$  GluD1<sup>501-600</sup> synapses) or the average number of GluD1 SSDs (h;  $p=0.2880$ ;  $n=173$  anti-GluD1<sup>895-932</sup> synapses and  $n=134$  GluD1<sup>501-600</sup> synapses). Significance:  $\chi^2$  test and Mann Whitney test respectively (two-tailed).

(i-k) anti-GluD1<sup>895-932</sup> and anti-GluD1<sup>501-600</sup> show no significant differences in the median distance from GluD1 SSDs to the Homer1 centroid (j;  $p=0.3376$ ;  $n=238$  anti-GluD1<sup>895-932</sup> SSDs and  $n=192$  GluD1<sup>501-600</sup> SSDs) and show similar radial distributions of GluD1 localizations (j) and GluD1 SSDs (k) at Homer1+ synapses with mean and 95% confidence interval of a Poisson distribution indicated on graph. Significance: Mann Whitney test (two-tailed).

(l-n) The nanoscale properties of anti-GluD1<sup>501-600</sup> exhibit no differences in HA-Nrxn1 and V5-Nrxn3 neurons. GluD1 compartment volume (l;  $p=0.7532$ ), number of SSDs (m;  $p=0.0984$ ;  $n=129$  HA-Nrxn1 synapses and  $n=134$  V5-Nrxn3 synapses), average SSD volume (n;  $p=0.1389$ ;  $n=88$  HA-Nrxn1 synapses and  $n=111$  V5-Nrxn3 synapses). Significance: Mann Whitney test (two-tailed).

Data from three independent experiments. Number of synapses indicated on graph unless stated in legend. Bar graphs and line graphs: average  $\pm$  SEM. Violin plots: median  $\pm$  upper and lower quartiles.

Hippocampal Cultures

HA-Nrxn1::V5-Nrxn3 does not affect PSD-95 or RIM1 SSDs in Hippocampal cultures

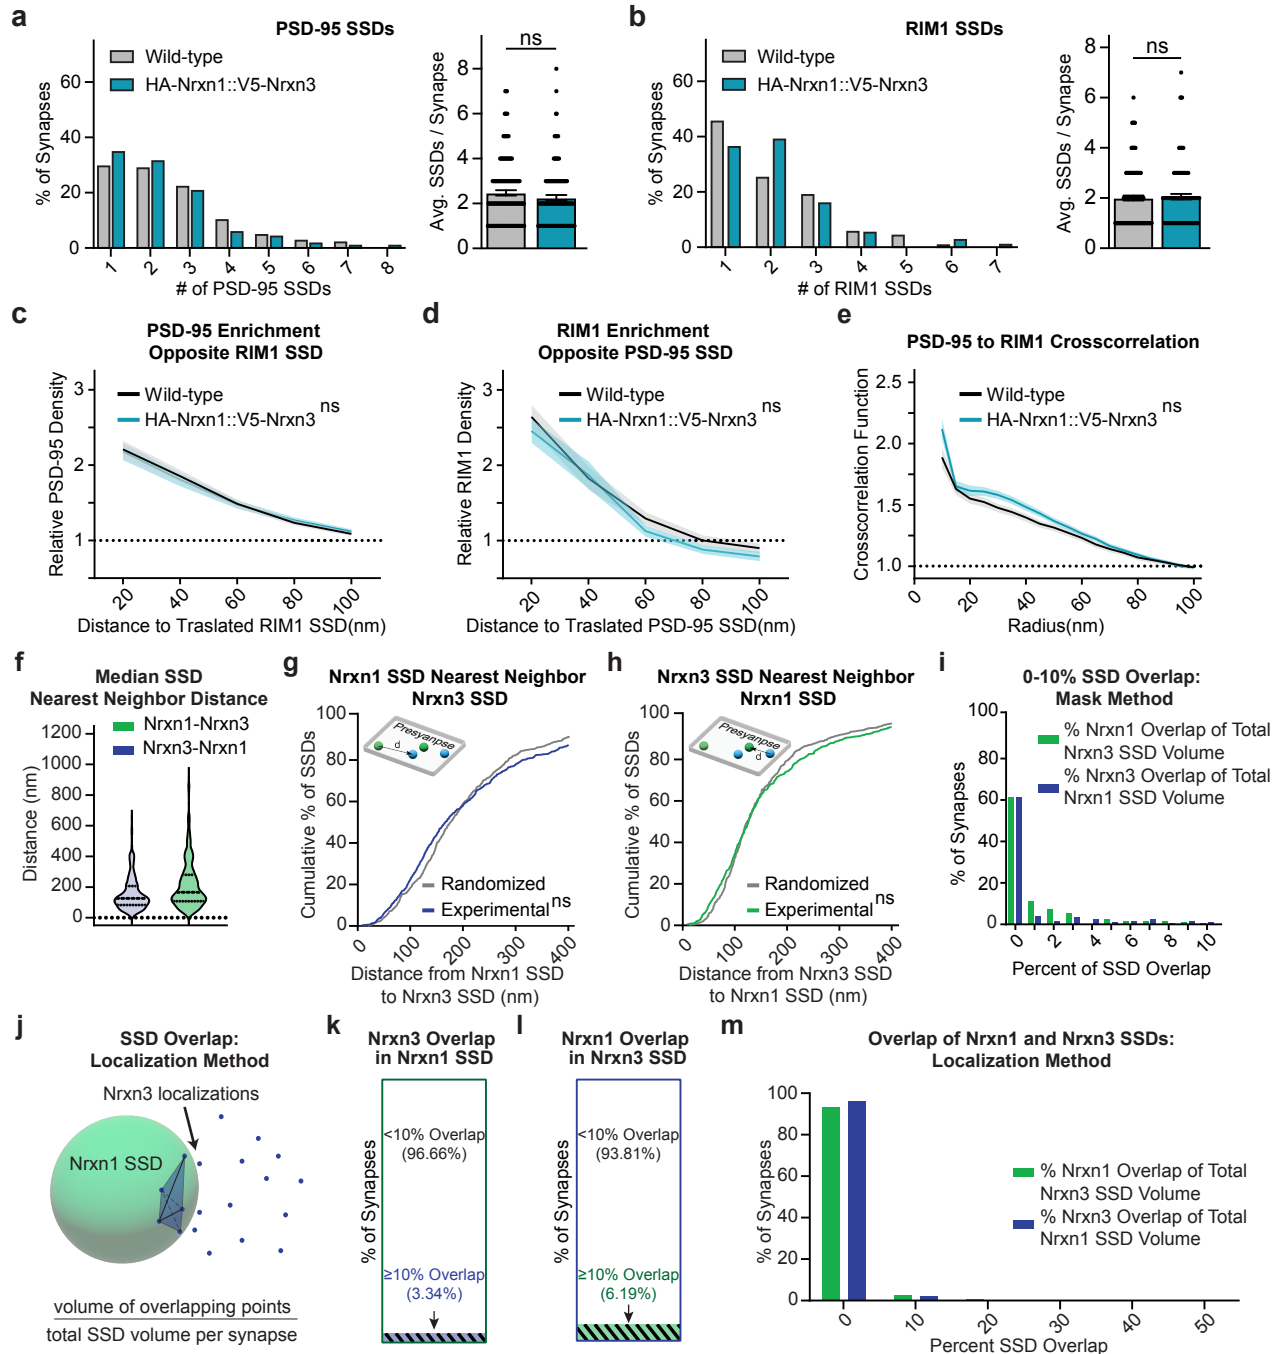

Cortical Cultures

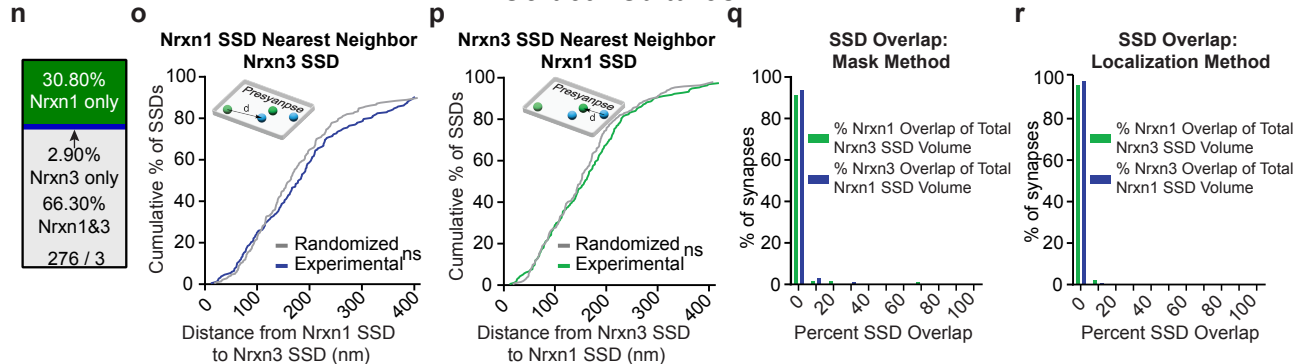

**Figure S7. Excitatory synaptic nanocolumns are maintained in *HA-Nrxn1::V5-Nrxn3* synapses and *Nrxn1* and *Nrxn3* are spatially distinct in cortical culture.**

(a-b) The nanoscale properties of excitatory synapses are not impacted in neurons that endogenously express both HA-Nrxn1 and V5-Nrxn3. The number of PSD-95 SSDs (a;  $p=0.1702$ ) or RIM1 SSDs (b;  $p=0.5552$ ;  $n=143$  wild-type and  $n=113$  HA-Nrxn1::V5-Nrxn3 synapses from two independent experiments). Significance: Mann Whitney test (two-tailed).

(c-e) Neurons from HA-Nrxn1::V5-Nrxn3 animals do not show any differences from wild-type neurons in measurements of transsynaptic alignment including PSD-95 enrichment opposite RIM1 SSDs (c;  $p=0.9487$ ;  $n=168$  wild-type and  $n=136$  HA-Nrxn1::V5-Nrxn3 synapses), RIM1 enrichment opposite PSD-95 SSDs (d;  $p=0.2072$ ;  $n=85$  wild-type and  $n=76$  HA-Nrxn1::V5-Nrxn3 synapses), or PSD-95 to RIM1 cross-correlation (e;  $p=0.1150$   $n=142$  wild-type and  $n=151$  HA-Nrxn1::V5-Nrxn3 synapses). Significance 2-way repeated measures ANOVA main effect of mouse line. Data from 3 independent experiments for wild-type and 2 independent experiments for HA-Nrxn1::V5-Nrxn3.

(f) Violin plots of nearest neighbor distances between Nrxn1 and Nrxn3 SSDs.  $n=345$  Nrxn3 and  $n=541$  Nrxn1 SSDs.

(g-h) Nearest neighbor distances of Nrxn1 SSDs to Nrxn3 SSDs (g) or Nrxn3 SSDs to Nrxn1 SSDs in hippocampal synapses (h). Relative to randomized values, Nrxn1 to Nrxn3 nearest neighbor distances,  $p=0.0767$  (541 experimental and randomized SSDs); Nrxn3 to Nrxn1 nearest neighbor distances,  $p=0.4845$  (345 experimental and randomized SSDs). Significance: Kolmogorov-Smirnov test.

(i) Histogram of 0-10% bin from Figure 7K showing the majority of these synapses have less than 1% overlap;  $n=155$  synapses for Nrxn1 overlap and  $n=187$  synapses for Nrxn3 overlap.

(j) Schematic of the overlapping localizations method.

(k-l) Stacked bar graphs of Nrxn3 localization overlap with Nrxn1 SSDs (k) and Nrxn1 localization overlap with Nrxn3 SSDs (l).  $n=210$  synapses.

(m) Frequency of percent overlap as determined by the overlapping localizations method.  $n=210$  synapses.

(n) Stacked bar graph showing the percentage of Homer1+ and Nrxn+ cortical synapses that contained HA-Nrxn1 only (top; green), V5-Nrxn3 only (middle; blue), or both HA-Nrxn1 and Nrxn3 (bottom; white).

(o-p) Same as (g-h) except in cortical synapses. The observed nearest neighbor distance between HA-Nrxn1 and V5-Nrxn3 was not closer than expected by chance when measuring nearest neighbor distances from HA-Nrxn1 to V5-Nrxn3 SSDs (o;  $p=0.3763$ ;  $n=217$  randomized and experimental SSDs) and vice versa (p;  $p=0.5243$ ,  $n=194$  randomized and experimental SSDs). Significance: Kolmogorov-Smirnov test.

(q) Histogram of percent overlap of HA-Nrxn1 and V5-Nrxn3 SSDs in cortical cultures using the mask method.  $n=149$  synapses.

(r) Histogram showing the observed percent overlap of HA-Nrxn1 and V5-Nrxn3 SSDs using the points method.  $n=149$  synapses.

Data from three independent experiments unless otherwise noted. Number of synapses indicated on graph unless stated in legend. Bar graphs and line graphs: average  $\pm$  SEM. Violin plots: median  $\pm$  upper and lower quartiles.

**Table S1. Summary of Nanoscale properties**

| Related to Figures 1 and S1                                   |         |                |        |                |          |                |        |                |
|---------------------------------------------------------------|---------|----------------|--------|----------------|----------|----------------|--------|----------------|
|                                                               | Control |                |        |                | Nrxn3 KO |                |        |                |
| Measure                                                       | Mean    | Lower Quartile | Median | Upper Quartile | Mean     | Lower Quartile | Median | Upper Quartile |
| GluA1 Compartment Volume (10 <sup>6</sup> nm <sup>3</sup> )   | 17.49   | 5.247          | 10.69  | 21.85          | 11.86    | 3.4            | 8.813  | 16.33          |
| GluA1 SSDs (avg. SSDs/synapse)                                | 1.828   | 1              | 2      | 2              | 1.51     | 1              | 1      | 2              |
| Avg. GluA1 SSD Volume (10 <sup>4</sup> nm <sup>3</sup> )      | 12.4    | 4.312          | 9.508  | 17.69          | 14.22    | 4.07           | 9.424  | 18.12          |
| RIM1 Compartment Volume (10 <sup>6</sup> nm <sup>3</sup> )    | 21.26   | 7.563          | 16.52  | 31.42          | 11.87    | 4.656          | 9.187  | 17.56          |
| RIM1 SSDs (avg. SSDs/synapse)                                 | 2.194   | 1              | 2      | 3              | 2.054    | 1              | 2      | 3              |
| Avg. RIM1 SSD Volume (10 <sup>4</sup> nm <sup>3</sup> )       | 18.03   | 5.508          | 14.08  | 25             | 11.05    | 3.724          | 8.842  | 16.35          |
| GluA1 Enrichment Index (% increase in relative density ≤60nm) | 102.9%  | 21.90%         | 90.80% | 172.50%        | 77.2%    | 22.30%         | 63.30% | 116.40%        |
| Avg. Crosscorrelation                                         |         |                |        |                |          |                |        |                |
| Enrichment Index (% increase in probability ≤50nm)            | 82.50%  | 17.20%         | 63.00% | 140.40%        | 59%      | 16.50%         | 48.30% | 95.10%         |
| GluA1 relative density in SSDs (normalized)                   | 1.376   | 0.7262         | 1      | 1.791          | 1.121    | 0.4727         | 0.808  | 1.581          |
| Related to Figure 2 and S2                                    |         |                |        |                |          |                |        |                |

|                                                          | Control      |                |        |                | Nrxn3 KO   |                |        |                |
|----------------------------------------------------------|--------------|----------------|--------|----------------|------------|----------------|--------|----------------|
| Measure                                                  | Mean         | Lower Quartile | Median | Upper Quartile | Mean       | Lower Quartile | Median | Upper Quartile |
| PSD-95 Compartment Volume ( $10^6$ nm <sup>3</sup> )     | 27.89        | 12.08          | 23.35  | 38             | 14.69      | 6.718          | 12.11  | 20.92          |
| PSD-95 SSDs (avg. SSDs/synapse)                          | 2.477        | 1              | 2      | 3              | 1.933      | 1              | 1      | 2              |
| Avg. PSD-95 SSD Volume ( $10^4$ nm <sup>3</sup> )        | 39.62        | 14.53          | 32.31  | 57.6           | 40.58      | 15.35          | 30.52  | 57.24          |
| RIM1 Compartment Volume ( $10^6$ nm <sup>3</sup> )       | 17.05        | 6.022          | 12.89  | 25.96          | 8.428      | 2.815          | 6.327  | 12.78          |
| RIM1 SSDs (avg. SSDs/synapse)                            | 2            | 1              | 2      | 3              | 1.791      | 1              | 1      | 2              |
| Avg. RIM1 SSD Volume ( $10^4$ nm <sup>3</sup> )          | 12.43        | 4.626          | 9.725  | 17.71          | 8.141      | 2.982          | 6.538  | 11.81          |
| <b>Related to Figure 5 and S4</b>                        |              |                |        |                |            |                |        |                |
|                                                          | Experimental |                |        |                | Randomized |                |        |                |
| Measure                                                  | Mean         | Lower Quartile | Median | Upper Quartile | Mean       | Lower Quartile | Median | Upper Quartile |
| Nrxn3 SSD nearest neighbor PSD-95 SSD (nm)               | 130.1        | 86.99          | 119.9  | 164.9          | 152.7      | 94.28          | 141.8  | 195.1          |
| PSD-95 SSD nearest neighbor Nrxn3 SSD                    | 162.9        | 103.9          | 146.3  | 208.5          | 187.1      | 118.2          | 173.3  | 239.8          |
| PSD-95 Enrichment Index (% increase in relative density) | 82.60%       | 28.00%         | 77.80% | 124.70%        | N/A        |                |        |                |
| <b>Related to Figure 6 and S5</b>                        |              |                |        |                |            |                |        |                |



|                                                                            | Experimental |                |        |                | Randomized |                |        |                |
|----------------------------------------------------------------------------|--------------|----------------|--------|----------------|------------|----------------|--------|----------------|
| Measure                                                                    | Mean         | Lower Quartile | Median | Upper Quartile | Mean       | Lower Quartile | Median | Upper Quartile |
| Nrxn1 SSD nearest neighbor PSD-95 SSD (nm)                                 | 205.2        | 116.8          | 192.1  | 272            | 227.7      | 134.3          | 205.1  | 298.3          |
| PSD-95 SSD nearest neighbor Nrxn1 SSD                                      | 241          | 140.1          | 214.6  | 311.6          | 267.1      | 157.4          | 242.2  | 356.6          |
| Avg. PSD-95 enrichment opposite Nrxn1 SSD (% increase in relative density) | 59.40%       | -15.60%        | 54.60% | 130.30%        | N/A        |                |        |                |
| <b>Related to Figure 7</b>                                                 |              |                |        |                |            |                |        |                |
|                                                                            | Nrxn1        |                |        |                | Nrxn3      |                |        |                |
| Measure                                                                    | Mean         | Lower Quartile | Median | Upper Quartile | Mean       | Lower Quartile | Median | Upper Quartile |
| LRRTM2 SSD nearest neighbor Nrxn SSD (nm)                                  | 164          | 116.1          | 147.5  | 200.6          | 133.1      | 71.9           | 121.7  | 185.9          |
| GluD1 SSD nearest neighbor Nrxn SSD (nm)                                   | 159.5        | 105.1          | 155.2  | 199            | 201.4      | 130            | 184    | 263.1          |
| <b>Related to Figure 8</b>                                                 |              |                |        |                |            |                |        |                |
|                                                                            | Nrxn1        |                |        |                | Nrxn3      |                |        |                |
| Measure                                                                    | Mean         | Lower Quartile | Median | Upper Quartile | Mean       | Lower Quartile | Median | Upper Quartile |
| RIM1 SSD nearest neighbor Nrxn SSD (nm)                                    | 229          | 126.8          | 199.3  | 307.1          | 167.3      | 93.48          | 146.5  | 215.8          |
| Nrxn SSD nearest neighbor RIM1 SSD (nm)                                    | 226.1        | 126.6          | 202.7  | 307            | 148.6      | 83.84          | 131.6  | 191.6          |
